# Supplementary material for: Salmonella Surveillance Systems in Swine and Humans in Spain: A Review
Source: MDPI journal article supplement (doi:10.3390/vetsci6010020), 2019-02-20
Supplement: s1 [file s1]

Article

## Supplementary Materials: *Salmonella* Surveillance Systems in Swine and Humans in Spain: A Review

Marta Martínez-Avilés <sup>1\*</sup>, Macarena Garrido-Esteba <sup>1</sup>, Julio Álvarez <sup>2,3</sup> and Ana de la Torre <sup>1</sup>

<sup>1</sup> Animal Health Research Center (INIA-CISA), Ctra Algete a El Casar s/n, 28130, Valdeolmos, Madrid, 28040, Spain; garrido.macarena@inia.es

<sup>2</sup> VISAVET Animal Health Surveillance Center, Complutense University of Madrid, Madrid, 28040, Spain; jalvarez@visavet.ucm.es

<sup>3</sup> Animal Health Department, Veterinary School, Complutense University of Madrid, Madrid, 28040, Spain; torre@inia.es

\* Correspondence: martinez.marta@inia.es; Tel.: +34-91-620-2300

Received: 10 January 2019; Accepted: 16 February 2019; Published: date

**Table S1.** Annex 1. Literature search results with the terms “*Salmonella*”, “pigs”, “Spain”, “epidemiology”.

**Comentado [MDPI1]:** Please carefully check the accuracy of names and affiliations.

**Comentado [MDPI2]:** Do you have department for the institution?

**Comentado [MDPI3]:** Please provide full name.

**Comentado [MDPI4]:** Please confirm the title.

**Con formato:** Fuente: Cursiva

|   | AUTHORS                  | TITLE                                                                                                                                                                       | TYPE               | YEAR | REFERENCE                                       |
|---|--------------------------|-----------------------------------------------------------------------------------------------------------------------------------------------------------------------------|--------------------|------|-------------------------------------------------|
| 1 | Mejía, W., et al.        | Epidemiology of <i>Salmonella</i> infections in pig units and antimicrobial susceptibility profiles of the strains of <i>Salmonella</i> species isolated                    | Scientific article | 2006 | Veterinary Record, 159: 271-276                 |
| 2 | García Feliz, C., et al. | <i>Salmonella enterica</i> Infections in Spanish Swine Fattening Units                                                                                                      | Scientific article | 2007 | Zoonoses and Public Health 54: 294-300          |
| 3 | García Feliz, C., et al. | Antimicrobial Resistance of <i>Salmonella enterica</i> Isolates from Apparently Healthy and Clinically Ill Finishing Pigs in Spain                                          | Scientific article | 2008 | Zoonoses and Public Health, 55: 195-205         |
| 4 | Vico, J.P., et al.       | Evaluation of three commercial enzyme-linked immunosorbent assays for the detection of antibodies against <i>Salmonella spp.</i> in meat juice from finishing pigs in Spain | Scientific article | 2010 | Zoonoses and Public Health 57 (Suppl.1):107-114 |
| 5 | García Feliz, C.         | Swine salmonellosis in Spain: prevalence, risk factors and antimicrobial resistance [in Spanish]                                                                            | PhD Thesis         | 2011 | León University, Spain, 211 pp.                 |
| 6 | Gómez-Laguna, J., et al. | Prevalence and antimicrobial susceptibility of <i>Salmonella</i> infections in free-range pigs                                                                              | Scientific article | 2011 | The Veterinary Journal, 190: 176-78             |
| 7 | Vico, J.P., et al.       | Salmonellosis in Finishing Pigs in Spain: Prevalence, Antimicrobial Agent Susceptibilities, and Risk Factor Analysis                                                        | Scientific article | 2011 | Journal of Food Protection, 74 (7): 1070-1078   |

|    |                             |                                                                                                                                                                             |                    |      |                                                        |
|----|-----------------------------|-----------------------------------------------------------------------------------------------------------------------------------------------------------------------------|--------------------|------|--------------------------------------------------------|
| 8  | Andrés, S., et al.          | Epidemiology of Subclinical Salmonellosis in Wild Birds from an Area of High Prevalence of Pig Salmonellosis: Phenotypic and Genetic Profiles of <i>Salmonella</i> Isolates | Scientific article | 2013 | Zoonoses and Public Health, 60: 355-365                |
| 9  | Argüello Rodríguez, H.      | Swine salmonellosis in Spain: risk factors in breeding pigs, control strategy in fattening pigs and importance at slaughter [in Spanish]                                    | PhD Thesis         | 2013 | León University, Spain, 331 pp.                        |
| 10 | Argüello, H., et al.        | Sero- and genotyping of <i>Salmonella</i> in slaughter pigs, from farm to cutting plant, with a focus on the slaughter process                                              | Scientific article | 2013 | International Journal of Food Microbiology, 161: 44-52 |
| 11 | Andrés-Barranco, S., et al. | Role of Wild Bird and Rodents in the Epidemiology of Subclinical Salmonellosis in Finishing Pigs                                                                            | Scientific article | 2014 | Foodborne Pathogens and Disease, 11 (9): 689-697       |
| 12 | González Clari, M.          | Epidemiology of <i>Salmonella</i> spp. In fattening pigs [in Spanish]                                                                                                       | PhD Thesis         | 2014 | Cardenal Herrera University- CEU, Spain, 248 pp.       |
| 13 | Casanova-Higes, A., et al.  | Influence of on-farm pig <i>Salmonella</i> status on <i>Salmonella</i> shedding at slaughter                                                                                | Scientific article | 2017 | Zoonoses and Public Health 2017, 64: 328-336           |
| 14 | Mainar-Jaime, R., et al.    | <i>Salmonella enterica</i> Infections in Spanish Swine Fattening Units                                                                                                      | Scientific article | 2018 | Zoonoses and Public Health 65:e222-e228                |
